# Supplementary material for: Transcriptome-based identification of key actin-binding proteins associated with high metastatic potential in breast cancer
Source: Front Mol Biosci. 2024 Aug 30;11:1440276. doi: 10.3389/fmolb.2024.1440276 (PMC11392851; doi:10.3389/fmolb.2024.1440276)
Supplement: Supplementary file 1 [file Table2.XLSX]

## Sheet: Discovery
Annotation					All samples (n=…)							Nodal status negative (n=…)
Probe_Id		GeneSymbol	EntrezId	GeneName	HR	HRlower	HRupper	Beta	StdErr	P	FDR	HR	HRlower	HRupper	Beta	StdErr	P	Significant*
200021_at	1	CFL1	1072	cofilin 1	8.42	3.2462	21.8398	2.13061	0.486297	1.17979e-05	0.00403489	10.8757	2.81418	42.0303	2.38653	0.689737	0.000540064	TRUE
205347_s_at	2	TMSB15A	11013	thymosin beta 15A	1.35041	1.17045	1.55803	0.300407	0.0729682	3.83909e-05	0.00656484	1.33481	1.10515	1.6122	0.288793	0.0963331	0.00271886	TRUE
204882_at	3	ARHGAP25	9938	Rho GTPase activating protein 25	0.703294	0.580084	0.852675	-0.35198	0.0982686	0.000341213	0.0388983	0.780463	0.594198	1.02512	-0.247868	0.139123	0.0748059	FALSE
214957_at	4	ACTL8	81569	actin like 8	1.36034	1.14265	1.61951	0.307734	0.0889746	0.000542845	0.0464132	1.30776	1.01492	1.68509	0.268318	0.129341	0.038033	FALSE
209950_s_at	5	VILL	50853	villin like	0.715339	0.586378	0.872661	-0.334999	0.101426	0.000956903	0.0654522	0.696141	0.537582	0.901467	-0.362203	0.131875	0.00602246	TRUE
202205_at	6	VASP	7408	vasodilator stimulated phosphoprotein	2.45787	1.42846	4.22913	0.899296	0.276893	0.00116297	0.0662893	2.17534	1.07766	4.39108	0.777186	0.358369	0.0301073	FALSE
202254_at	7	SIPA1L1	26037	signal induced proliferation associated 1 like 1	0.68823	0.546079	0.867384	-0.373633	0.118043	0.00154958	0.0757081	0.883546	0.631209	1.23676	-0.123812	0.171588	0.470562	FALSE
214051_at	8	TMSB15B	286527	thymosin beta 15B	1.47686	1.15346	1.89094	0.389922	0.1261	0.00198708	0.0849477	1.48588	1.06381	2.0754	0.396006	0.170486	0.0201896	FALSE
*Significance threshold after multiple test correction (Bonferroni, p<0.05/6)

## Sheet: Validation
GEO Dataset	Probe_Id	GeneSymbol	EntrezId	GeneName	HR	HRlower	HRupper	Beta	StdErr	P*
GSE2034	200021_at	CFL1	1072	cofilin 1	1.57201	0.92415	2.67405	0.452356	0.271044	0.0951298
GSE6532					6.05676	1.4394	25.4858	1.80117	0.733151	0.0140197
GSE11121					4.16949	1.02848	16.9032	1.42779	0.71415	0.045577
GSE21653					1.08629	0.810323	1.45625	0.0827694	0.14954	0.579924
GSE2034	205347_s_at	TMSB15A	11013	thymosin beta 15A	1.14881	1.00664	1.31105	0.138723	0.067401	0.0395737
GSE6532					-	-	-	-	-	-
GSE11121					1.31495	1.08021	1.60072	0.273802	0.100334	0.00635443
GSE21653					1.10751	0.974448	1.25874	0.102115	0.065307	0.117908
GSE2034	209950_s_at	VILL	50853	villin like	1.03817	0.890269	1.21064	0.0374592	0.0784151	0.632861
GSE6532					-	-	-	-	-	-
GSE11121					0.892624	0.700149	1.13801	-0.113589	0.123917	0.359323
GSE21653					0.896275	0.599476	1.34002	-0.109508	0.205203	0.593581
*Genes with a p-value<0.05 in at least two independent validation cohorts were considered as candidates
